# Supplementary material
Source: PubMed Central journal article supplement (PMC5584672)
Supplement: NIHMS73212-supplement-1.pdf [file NIHMS73212-supplement-1.pdf]

1 **Positive selection inhibits gene mobilisation and transfer in soil bacterial**  
2 **communities**

3

4 **Supplementary Information**

5

6 James P. J. Hall<sup>1,2\*</sup>, David Williams<sup>3</sup>, Steve Paterson<sup>3</sup>, Ellie Harrison<sup>1</sup>, Michael A. Brockhurst<sup>1\*</sup>

7

8 <sup>1</sup>Department of Animal and Plant Sciences, University of Sheffield, Western Bank, Sheffield, S10 2TN,  
9 United Kingdom

10 <sup>2</sup>Department of Biology, University of York, York, YO10 5DD, United Kingdom

11 <sup>3</sup>Institute of Integrative Biology, University of Liverpool, Biosciences Building, Liverpool, L69 7ZB,  
12 United Kingdom

13

14 \*Correspondence to: [j.p.hall@sheffield.ac.uk](mailto:j.p.hall@sheffield.ac.uk), [m.brockhurst@sheffield.ac.uk](mailto:m.brockhurst@sheffield.ac.uk)

15

16 **Supplementary Table 1: Numbers of clones sequenced from each population**

| plasmid treatment | culture        | mercury treatment | species <sup>a</sup> | # clones sequenced from replicate |   |   |   |   |   |
|-------------------|----------------|-------------------|----------------------|-----------------------------------|---|---|---|---|---|
|                   |                |                   |                      | a                                 | b | c | d | e | f |
| pQBR57            | single-species | 0                 | Pf                   | 1                                 | 2 | 2 | 2 | 2 | 2 |
| pQBR57            | single-species | 0                 | Pp                   | 1                                 | 1 | 1 | 1 | 1 | 1 |
| pQBR57            | single-species | 16                | Pf                   | 1                                 | 1 | 1 | 1 | 1 | 1 |
| pQBR57            | single-species | 16                | Pp                   | 1                                 | 1 | 1 | 2 | 1 | 2 |
| pQBR57            | co-cultured    | 0                 | Pf                   | 1                                 | 2 | 2 | 2 | 1 | 2 |
| pQBR57            | co-cultured    | 0                 | Pp                   | 1                                 | 2 | 2 | 2 | 2 | 2 |
| pQBR57            | co-cultured    | 16                | Pf                   | 1                                 | 1 | 1 | 1 | 1 | 1 |
| pQBR57            | co-cultured    | 16                | Pp                   | 2                                 | 2 | 2 | 2 | 2 | 2 |
| plasmid-free      | single-species | 0                 | Pf                   | 1                                 | 0 | 1 | 1 | 0 | 0 |
| plasmid-free      | single-species | 0                 | Pp                   | 1                                 | 0 | 1 | 1 | 0 | 0 |
| plasmid-free      | single-species | 16                | Pf                   | 1                                 | 0 | 1 | 1 | 0 | 0 |
| plasmid-free      | single-species | 16                | Pp                   | 1                                 | 0 | 1 | 1 | 0 | 0 |
| plasmid-free      | co-cultured    | 0                 | Pf                   | 1                                 | 0 | 0 | 1 | 0 | 0 |
| plasmid-free      | co-cultured    | 0                 | Pp                   | 1                                 | 0 | 0 | 1 | 0 | 0 |
| plasmid-free      | co-cultured    | 16                | Pf                   | 1                                 | 0 | 0 | 1 | 0 | 0 |
| plasmid-free      | co-cultured    | 16                | Pp                   | 1                                 | 0 | 0 | 1 | 0 | 0 |

17 <sup>a</sup>Pf = *Pseudomonas fluorescens* SBW25; Pp = *Pseudomonas putida* KT2440.

18 **Supplementary Table 2:** Focal Tn4652 insertions in co-cultured *P. fluorescens*.

| population | transfer | total clones <sup>a</sup> | clones with pQBR57 <sup>a</sup> | pQBR57 with Tn4652 <sup>b</sup> | focal chromosomal Tn4652 <sup>b</sup> |
|------------|----------|---------------------------|---------------------------------|---------------------------------|---------------------------------------|
| d          | 1        | 31                        | 5                               | 0/5                             | NA                                    |
| d          | 3        | 32                        | 3                               | 0/3                             | NA                                    |
| d          | 5        | 32                        | 2                               | 0/1                             | NA                                    |
| d          | 7        | 32                        | 1                               | 0/1                             | NA                                    |
| d          | 9        | 32                        | 0                               | NA                              | NA                                    |
| d          | 11       | 32                        | 0                               | NA                              | NA                                    |
| d          | 13       | 32                        | 0                               | NA                              | NA                                    |
| d          | 15       | 32                        | 0                               | NA                              | NA                                    |
| d          | 17       | 32                        | 0                               | NA                              | NA                                    |
| d          | 23       | 32                        | 0                               | NA                              | NA                                    |
| d          | 29       | 32                        | 0                               | NA                              | 0/32                                  |
| d          | 35       | 32                        | 0                               | NA                              | 0/32                                  |
| d          | 41       | 32                        | 23                              | 23/23                           | 0/32                                  |
| d          | 47       | 32                        | 22                              | 6/6                             | 0/32                                  |
| d          | 53       | 32                        | 20                              | 6/6                             | 0/32                                  |
| d          | 59       | 32                        | 26                              | 7/7                             | 1/32                                  |
| d          | 65       | 32                        | 13                              | 4/4                             | 7/32                                  |
| e          | 1        | 31                        | 2                               | 0/2                             | NA                                    |
| e          | 3        | 32                        | 3                               | 1/3                             | NA                                    |
| e          | 5        | 32                        | 1                               | 1/1                             | NA                                    |
| e          | 7        | 32                        | 1                               | 1/1                             | NA                                    |
| e          | 9        | 32                        | 0                               | NA                              | 0/32                                  |
| e          | 11       | 32                        | 3                               | 3/3                             | 0/32                                  |
| e          | 13       | 32                        | 14                              | 14/14                           | 0/32                                  |
| e          | 15       | 40                        | 30                              | 29/29                           | 0/32                                  |
| e          | 17       | 32                        | 30                              | 8/8                             | 0/32                                  |
| e          | 23       | 32                        | 31                              | 8/8                             | 0/32                                  |
| e          | 29       | 32                        | 31                              | 8/8                             | 0/32                                  |
| e          | 35       | 32                        | 32                              | 8/8                             | 0/32                                  |
| e          | 41       | 32                        | 31                              | 8/8                             | 0/32                                  |
| e          | 47       | 32                        | 32                              | 8/8                             | 0/32                                  |
| e          | 53       | 32                        | 32                              | 8/8                             | 0/32                                  |
| e          | 59       | 32                        | 32                              | 8/8                             | 0/32                                  |
| e          | 65       | 32                        | 32                              | 8/8                             | 18/32                                 |
| f          | 1        | 31                        | 5                               | 0/2                             | NA                                    |
| f          | 3        | 32                        | 2                               | 0/2                             | NA                                    |
| f          | 5        | 32                        | 2                               | 0/2                             | NA                                    |
| f          | 7        | 32                        | 2                               | 0/1                             | NA                                    |
| f          | 9        | 32                        | 1                               | 1/1                             | NA                                    |
| f          | 11       | 32                        | 0                               | NA                              | NA                                    |
| f          | 13       | 32                        | 2                               | 0/2                             | NA                                    |
| f          | 15       | 32                        | 0                               | NA                              | NA                                    |
| f          | 17       | 32                        | 2                               | 1/2                             | 0/32                                  |
| f          | 23       | 32                        | 0                               | NA                              | 0/32                                  |
| f          | 29       | 32                        | 1                               | 1/1                             | 0/32                                  |
| f          | 35       | 32                        | 16                              | 5/5                             | 0/32                                  |
| f          | 41       | 32                        | 30                              | 8/8                             | 1/32                                  |
| f          | 47       | 32                        | 24                              | 6/6                             | 0/32                                  |
| f          | 53       | 32                        | 29                              | 7/7                             | 1/31                                  |
| f          | 59       | 32                        | 22                              | 7/7                             | 0/32                                  |
| f          | 65       | 32                        | 8                               | 4/4                             | 1/32                                  |

<sup>a</sup>Identified previously <sup>17</sup>. <sup>b</sup>Number of clones positive/tested for each insertion; NA indicates no clones tested.

21 **Supplementary Table 3: Repetitive regions prone to spurious SNV/indel calling**

| Chromosome <sup>a</sup> | Start   | End     | Notes                                                          |
|-------------------------|---------|---------|----------------------------------------------------------------|
| AE015451                | 194394  | 220642  | Huge, highly repetitive gene with ~29 direct repeats           |
| AE015451                | 532498  | 532500  | Intergenic SNV present in ancestral Gm-labelled clone          |
| AE015451                | 699715  | 699725  | Intergenic region between 16S and 23S genes                    |
| AE015451                | 1026450 | 1028210 | Deletion in all clones (inc. ancestor) from 1026468 to 1028201 |
| AE015451                | 6170425 | 6170440 | Region of Tn7 insertion for labelling                          |
| AM181176                | 895200  | 895500  | Repeat region between PFLU_0795 and PFLU_0796                  |
| AM181176                | 3694000 | 3694600 | Repeat region between PFLU_3336 and PFLU_3338                  |
| AM181176                | 4696690 | 4696700 | Intergenic region between 16S and 23S genes                    |

22 <sup>a</sup>Chromosome AE015451 is the *P. putida* KT2440 chromosome, AM181176 is the *P. fluorescens* SBW25  
 23 chromosome.

24  
 25

**Supplementary Table 4: Oligonucleotide primers used in this study**

| Primer name    | Primer sequence         | Target and purpose                                                                                                                                                              |
|----------------|-------------------------|---------------------------------------------------------------------------------------------------------------------------------------------------------------------------------|
| PPUT_25728F    | TAGTTGTTTCTAGGGCCCGC    | With Tn5042_104312R, detection of focal Tn5042 insertion in <i>P. putida</i> from mercury-treated single-species populations a, b and c; and co-culture populations c, d and e. |
| PPUT_26783     | CAGATCGCCAGTTCCTCC      |                                                                                                                                                                                 |
| PPUT_18790F    | TTCACGACCGCTTCAGAAAC    | With Tn5042_104312R, detection of focal Tn5042 insertion in <i>P. putida</i> from mercury-treated single-species population e.                                                  |
| PPUT_19899R    | TAGGAAGCCAGGTAGAAGCG    |                                                                                                                                                                                 |
| PPUT_17886F    | GAAGGTACATCGCCAAGCTG    | With Tn5042_104312R, detection of focal Tn5042 insertion in <i>P. putida</i> from mercury-treated co-culture population f.                                                      |
| PPUT_18868R    | CACACCTCCCTGCTCTTACC    |                                                                                                                                                                                 |
| Tn5042_104312R | TGAGATGCAAGCGGTGTAG     | Detection of focal Tn5042 insertions.                                                                                                                                           |
| PFLU_5829752F  | CTGAACAAACCGCCGTCAC     | With Tn5042_110902F, detection of focal Tn5042 insertion in <i>P. fluorescens</i> from mercury-free co-culture population e.                                                    |
| PFLU_5830219R  | CCCCTGACTATTCCCAAAGG    |                                                                                                                                                                                 |
| Tn5042_110902F | TCTCGGAATGACACTCTGCC    | Detection of focal Tn5042 insertion.                                                                                                                                            |
| PFLU_3328819F  | GTCAGACGCAAAGCCTCTTC    | With Tn4652_3383009, detection of focal Tn4652 insertion in <i>P. fluorescens</i> chromosome from mercury-free co-culture population d.                                         |
| PFLU_3329140R  | TCAAATAAATTCCGAAACTCCCG |                                                                                                                                                                                 |
| PFLU_3328819F  | CACTGCGCGGTAATCATC      | With Tn4652_3383009, detection of focal Tn4652 insertion in <i>P. fluorescens</i> chromosome from mercury-free co-culture population e.                                         |
| PFLU_3323136R  | CAACTCACTGCACGCCTC      |                                                                                                                                                                                 |
| PFLU_3327408F  | TCCCACCTACCAATTCCTGAG   | With Tn4652_3383009, detection of focal Tn4652 insertion in <i>P. fluorescens</i> chromosome from mercury-free co-culture population f.                                         |
| PFLU_3327712R  | GATGGCCGAGAGTTTCAG      |                                                                                                                                                                                 |
| pQBR57_162616F | AAGTTGCTTGATCGCCTTCG    | With Tn4652_3383009, detection of focal Tn4652 insertion in pQBR57.                                                                                                             |
| pQBR57_162875R | TGTGCCGTGGAATGAATCAG    |                                                                                                                                                                                 |
| Tn4652_3383009 | TAGCCAAAGGAGGGGAGTTG    | Detection of focal Tn4652 insertions.                                                                                                                                           |
| PFLU_1891F     | CGTTGCCTACTTACAGACGC    | Detection of Tn6291 in <i>P. putida</i> .                                                                                                                                       |
| PFLU_1891R     | CATTGCCGTACCTGGTATGC    |                                                                                                                                                                                 |
| PFLU_1908F     | GTAGCTCTTTTGGCAGGCTC    |                                                                                                                                                                                 |
| PFLU_1908R     | CAAAGCCAGCACTGATACCG    |                                                                                                                                                                                 |
